# Supplementary material for: Generalizable, tunable control of divalent cation solvation structure via mixed anion contact ion pair formation
Source: Royal Society of Chemistry journal article supplement (doi:10.1039/d3ta07613j), 2024-01-01
Supplement: d3ta07613j1.pdf [file d3ta07613j1.pdf]

Supplementary Information

**Generalizable, Tunable Control of Divalent Cation Solvation Structure via Mixed Anion Contact Ion Pair Formation**

*Sydney N. Lavan<sup>1,2</sup>, Stefan Illic<sup>1,2</sup>, Shashwat Viswanath<sup>1,2</sup>, Akash Jain<sup>1,2</sup>, Rajeev S. Assary<sup>1,2</sup> and Justin G. Connell<sup>1,2\*</sup>*

<sup>1</sup> *Joint Center for Energy Storage Research, Argonne National Laboratory, Lemont, IL 60439, USA*

<sup>2</sup> *Materials Science Division, Argonne National Laboratory, Lemont, IL 60439, USA*

\* *Email: [jconnell@anl.gov](mailto:jconnell@anl.gov)*

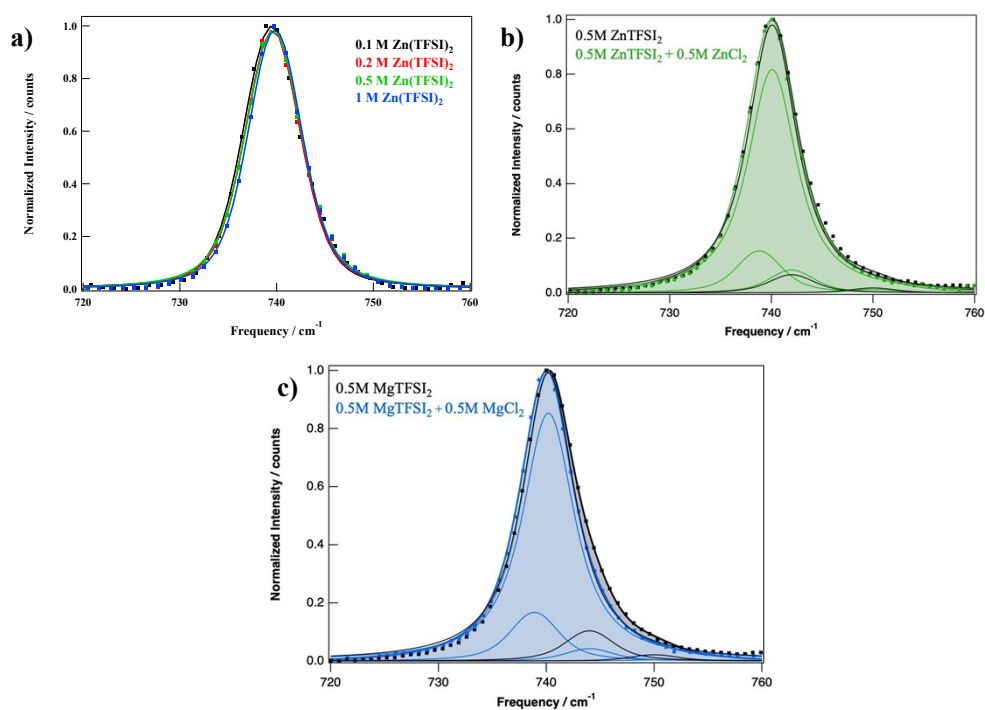

**Figure S1.** (a) ZnTFSI<sub>2</sub> concentration dependence Raman spectra of the TFSI<sup>-</sup> breathing mode. (b) Higher concentration of 1M ZnTFSI<sub>2</sub> in black compared to 1:1 ratio of ZnTFSI<sub>2</sub>:ZnCl<sub>2</sub> in green. (c) Higher concentration of 1M MgTFSI<sub>2</sub> in black compared to 1:1 ratio of MgTFSI<sub>2</sub>:MgCl<sub>2</sub> in blue.

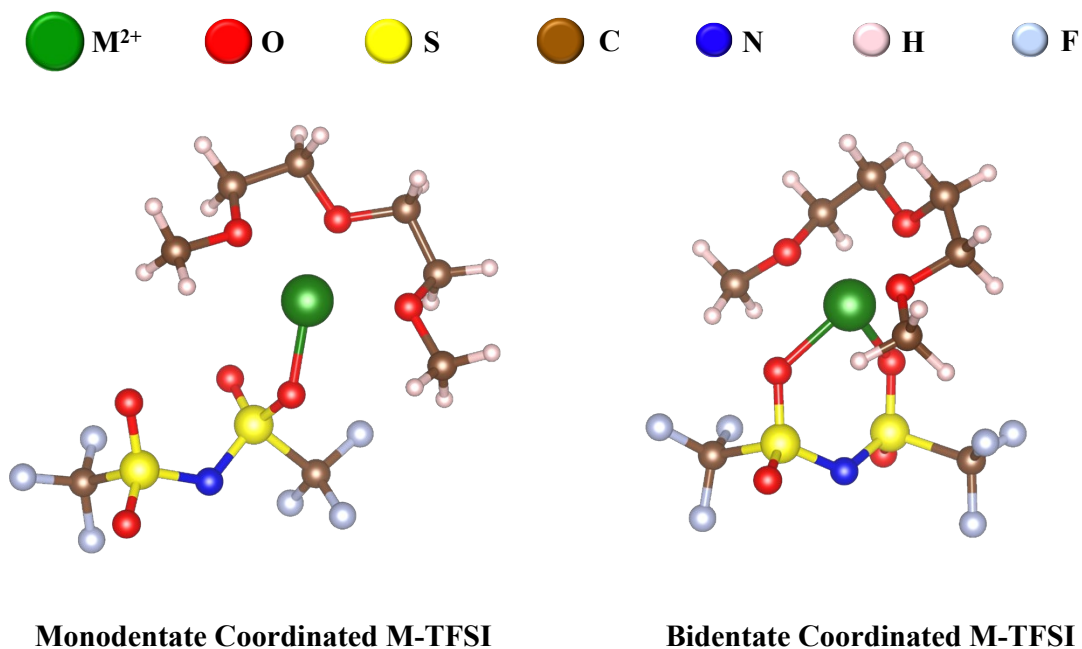

**Figure S2.** DFT modeled structures of metal cation (M=Zn, Mg and Cu) coordinated to TFSI in a mono- or bidentate configuration with an explicit G2 molecule. M(TFSI)<sup>mono</sup>(G2) and M(TFSI)<sup>bi</sup>(G2)

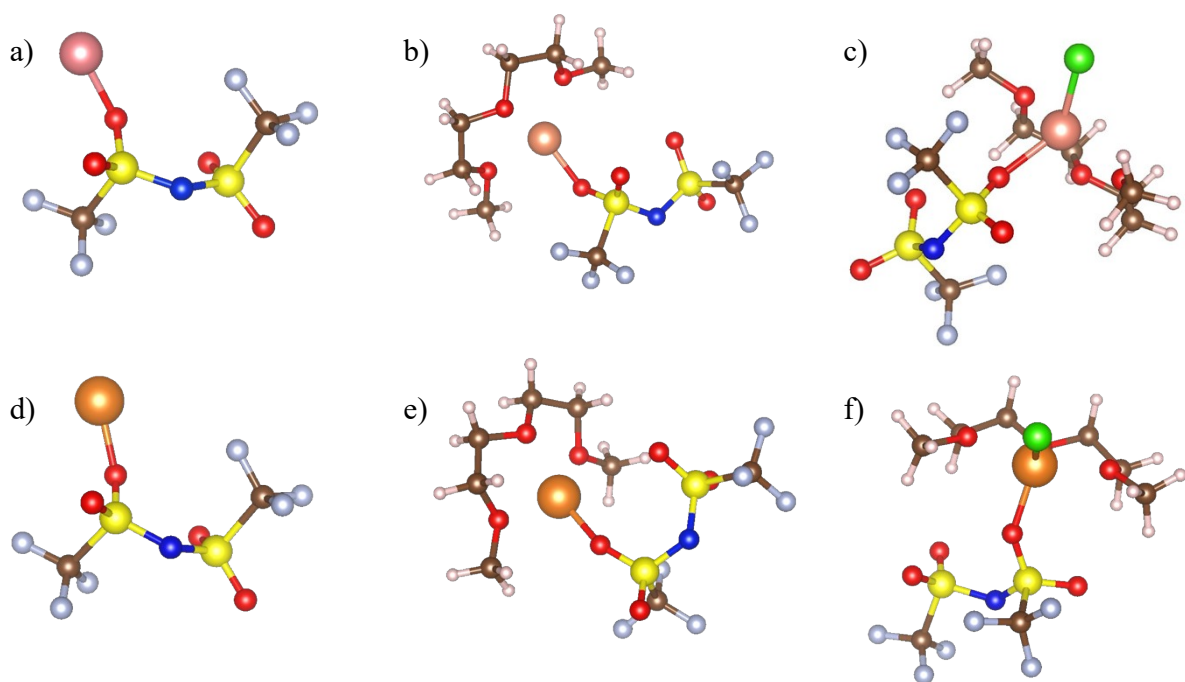

**Figure S3.** Optimized morphologies of the 6 DFT structures studied. Zn is top row a-c and Mg is bottom row d-f.

**Table S1.** DFT computed free energy of the six (1 to 6) complexation reactions.

| <u>Reactants</u>                   | <u>Products</u>                  | <u>Calculated <math>\Delta G</math></u> |
|------------------------------------|----------------------------------|-----------------------------------------|
| <b>1. Mg + 2G2 + TFSI</b>          | <b>Mg-TFSI + 2G2</b>             | <b>-0.09 eV</b>                         |
| <b>2. 2 Mg + 2G2 + 2Cl + 2TFSI</b> | <b>2Mg-TFSI-Cl + 2G2</b>         | <b>-1.28 eV</b>                         |
| <b>3. Zn + 2G2 + TFSI</b>          | <b>Zn-TFSI + 2G2</b>             | <b>-0.04 eV</b>                         |
| <b>4. 2 Zn + 2G2 + 2Cl + 2TFSI</b> | <b>2Zn-TFSI-Cl + 2G2</b>         | <b>-1.61 eV</b>                         |
| <b>5. Cu + 2G2 + TFSI</b>          | <b>Cu-TFSI<sup>+</sup> + 2G2</b> | <b>-0.18 eV</b>                         |
| <b>6. 2Cu + 2G2 + 2Cl + 2TFSI</b>  | <b>2Cu-TFSI-Cl + 2G2</b>         | <b>-1.75 eV</b>                         |

For the calculated free energies, we divided the overall value by two for reactions 2, 4 and 6 to enable direct comparison with the energies calculated in reactions 1, 3 and 5.

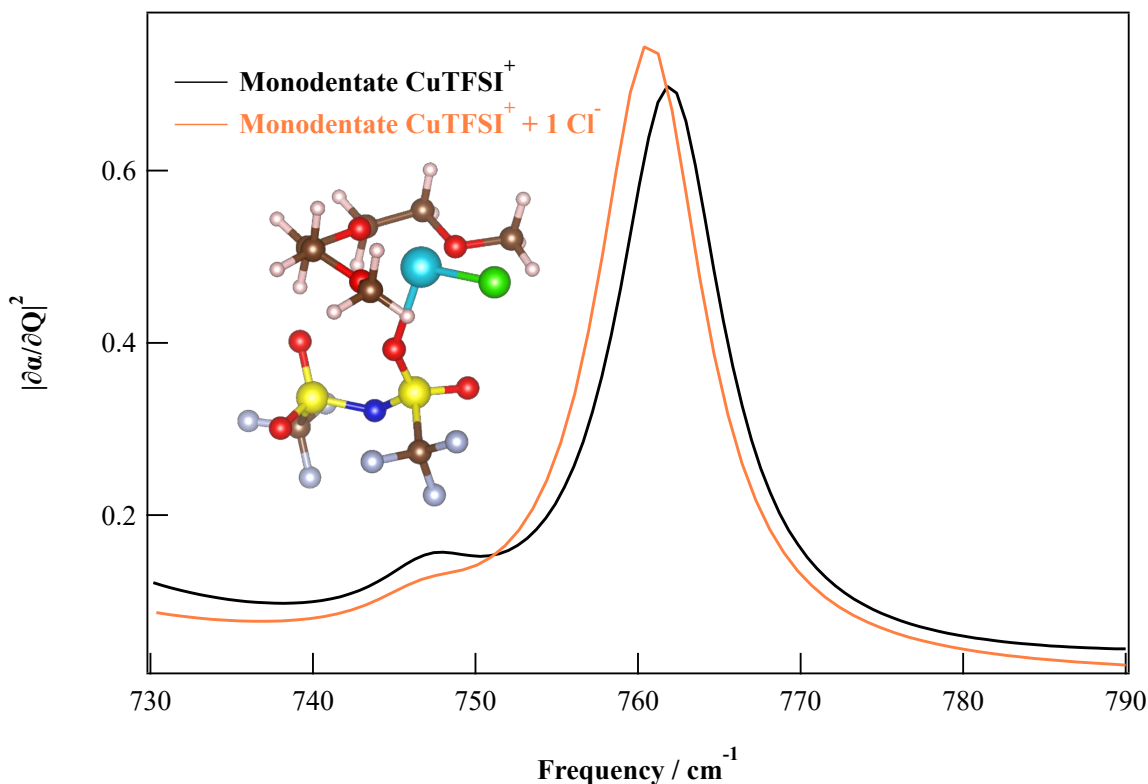

**Figure S4.** DFT calculated Raman spectra for  $\text{Cu}(\text{TFSI})^{\text{mono}}(\text{G}2)$  and  $\text{Cu}(\text{TFSI})^{\text{mono}}(\text{Cl})(\text{G}2)$ .

**Table S2.** Relative percent populations of the different TFSI/halide ratios solvation environments for zinc determined from fitting of experimental Raman data.

| Solvation Structure           | 0.1M ZnTFSI <sub>2</sub> | 0.1M ZnTFSI <sub>2</sub> + 0.025M ZnCl <sub>2</sub> | 0.1M ZnTFSI <sub>2</sub> + 0.05M ZnCl <sub>2</sub> | 0.1M ZnTFSI <sub>2</sub> + 0.1M ZnCl <sub>2</sub> | 0.1M ZnTFSI <sub>2</sub> + 0.2M ZnCl <sub>2</sub> |
|-------------------------------|--------------------------|-----------------------------------------------------|----------------------------------------------------|---------------------------------------------------|---------------------------------------------------|
| Zn(TFSI) <sup>mono</sup> (Cl) | -                        | 13%                                                 | 16%                                                | 40%                                               | 41%                                               |
| “Free” TFSI <sup>-</sup>      | 95%                      | 82%                                                 | 79%                                                | 54%                                               | 56%                                               |
| Zn(TFSI) <sup>mono</sup>      | 2%                       | 3%                                                  | 3%                                                 | 3%                                                | 3%                                                |
| Zn(TFSI) <sup>bi</sup>        | 3%                       | 2%                                                  | 2%                                                 | 3%                                                | -                                                 |

**Table S3.** Relative percent populations of the different TFSI/halide ratios solvation environments for magnesium determined from fitting of experimental Raman data.

| Solvation Structure           | 0.1M MgTFSI <sub>2</sub> | 0.1M MgTFSI <sub>2</sub> + 0.025M MgCl <sub>2</sub> | 0.1M MgTFSI <sub>2</sub> + 0.05M MgCl <sub>2</sub> | 0.1M MgTFSI <sub>2</sub> + 0.1M MgCl <sub>2</sub> | 0.1M MgTFSI <sub>2</sub> + 0.2M MgCl <sub>2</sub> |
|-------------------------------|--------------------------|-----------------------------------------------------|----------------------------------------------------|---------------------------------------------------|---------------------------------------------------|
| Mg(TFSI) <sup>mono</sup> (Cl) | -                        | 20%                                                 | 43%                                                | 51%                                               | 61%                                               |
| “Free” TFSI <sup>-</sup>      | 89%                      | 71%                                                 | 49%                                                | 43%                                               | 36%                                               |
| Mg(TFSI) <sup>mono</sup>      | 9%                       | 7%                                                  | 6%                                                 | 3%                                                | 1%                                                |
| Mg(TFSI) <sup>bi</sup>        | 2%                       | 2%                                                  | 2%                                                 | 2%                                                | 2%                                                |

**Table S4.** Relative percent populations of the different TFSI/halide ratios solvation environments for calcium determined from fitting of experimental Raman data.

| Solvation Structure           | 0.1M CaTFSI <sub>2</sub> | 0.1M CaTFSI <sub>2</sub> + 0.025M CaCl <sub>2</sub> | 0.1M CaTFSI <sub>2</sub> + 0.05M CaCl <sub>2</sub> | 0.1M CaTFSI <sub>2</sub> + 0.1M CaCl <sub>2</sub> | 0.1M CaTFSI <sub>2</sub> + 0.2M CaCl <sub>2</sub> |
|-------------------------------|--------------------------|-----------------------------------------------------|----------------------------------------------------|---------------------------------------------------|---------------------------------------------------|
| Ca(TFSI) <sup>mono</sup> (Cl) | -                        | 38%                                                 | 36%                                                | 19%                                               | 19%                                               |
| “Free” TFSI <sup>-</sup>      | 48%                      | 33%                                                 | 36%                                                | 56%                                               | 56%                                               |
| Ca(TFSI) <sup>mono</sup>      | 4%                       | 7%                                                  | 6%                                                 | 2%                                                | 4%                                                |
| Ca(TFSI) <sup>CIP</sup>       | 31%                      | 13%                                                 | 15%                                                | 14%                                               | 13%                                               |
| Ca(TFSI) <sup>bi</sup>        | 17%                      | 8%                                                  | 8%                                                 | 9%                                                | 8%                                                |

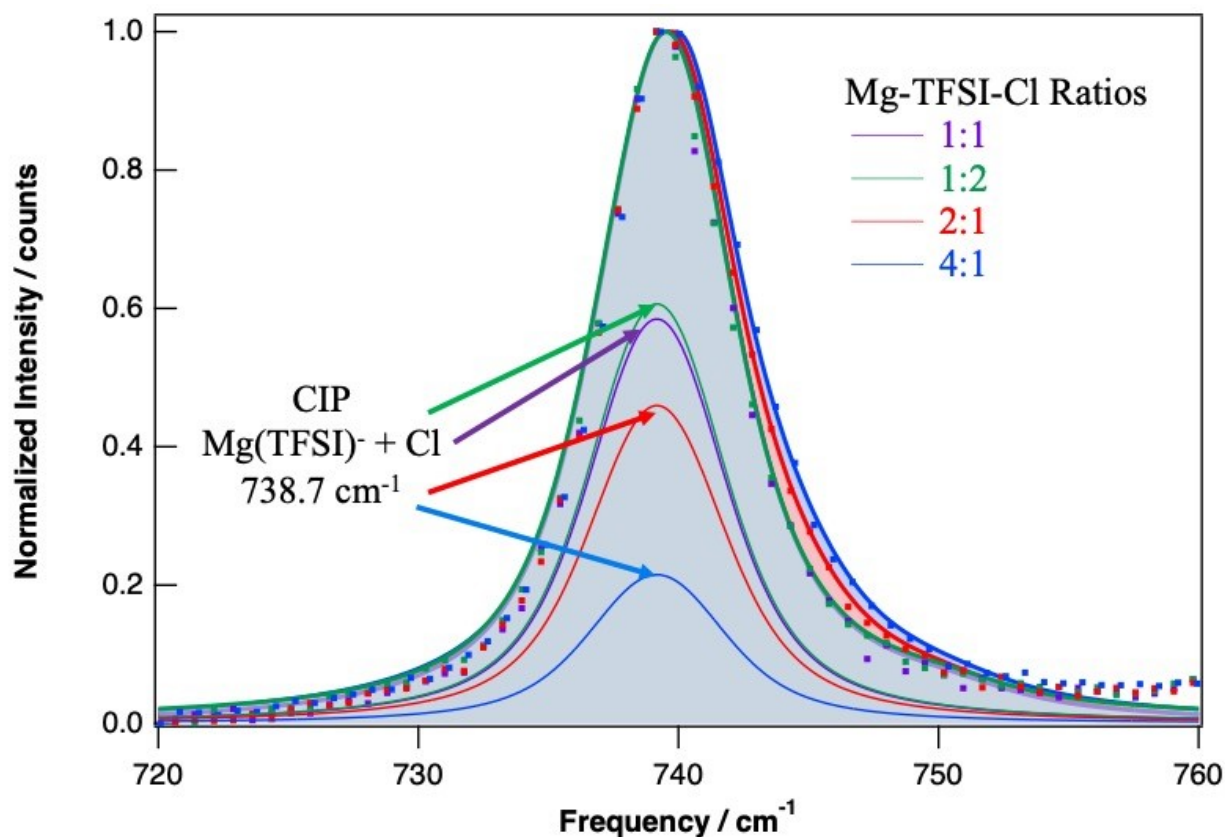

**Figure S5.** Experimental Raman spectra of Mg-TFSI:Cl ratio. Highlighting the evolution of the mixed contact ion pair.
